# Supplementary material for: Facile Photochemical Syntheses of Conjoined Nanotwin Gold-Silver Particles within a Biologically-Benign Chitosan Polymer
Source: MDPI journal article supplement (doi:10.3390/nano9040596), 2019-04-11
Supplement: s1 [file s1]

# Facile Photochemical Syntheses of Conjoined Gold-Silver Nanoparticle within a Biologically Benign Chitosan Polymer

Daniel K. Korir <sup>1</sup>, Bharat Gwalani <sup>2</sup>, Abel Joseph <sup>1</sup>, Brian Kamras <sup>1</sup>, Ravi K. Arvapally <sup>1</sup>,  
Mohammad A. Omary <sup>1,\*</sup> and Sreekar B. Marpu <sup>1,\*</sup>

<sup>1</sup> Department of Chemistry, University of North Texas, Denton, TX 76203, USA;  
DanielKorir@my.unt.edu (D.K.); AbelJoseph2@my.unt.edu (A.J.); BrianKamras@my.unt.edu (B.K.);  
RaviArvapally@my.unt.edu (R.K.A.)

<sup>2</sup> Department of Materials Science and Engineering, University of North Texas, Denton, TX 76203, USA;  
BharatGwalani@my.unt.edu

\* Correspondence: Mohammad.Omary@unt.edu (M.A.O.); sreekarbabu.marpu@unt.edu (S.B.M.)

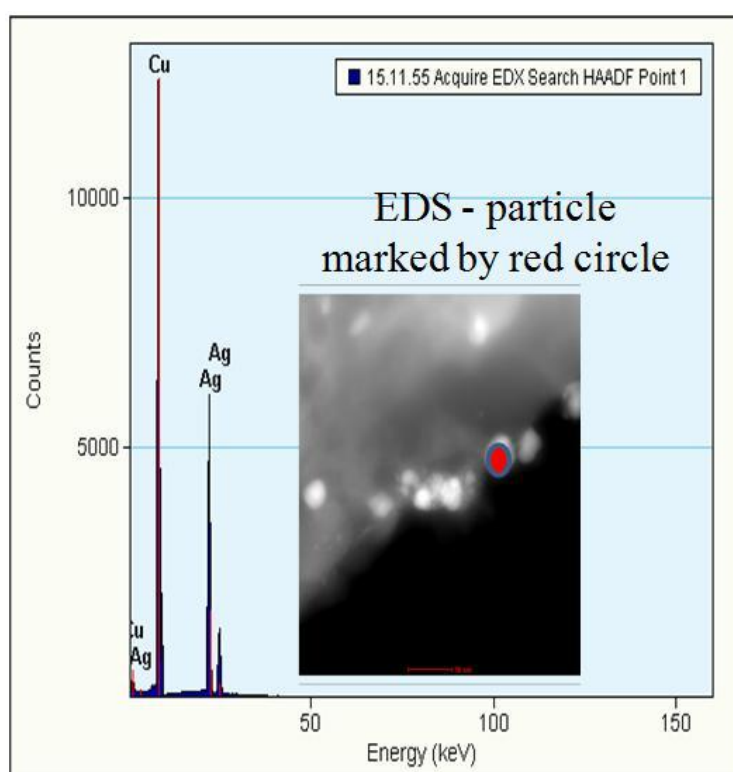

**Figure S1.** Elemental characterization of conjoined Au-Ag nano-twins formed by prolonged irradiation (more than one hour) of the seed in the seeding step and 30 min in the second step.
